# Supplementary material
Source: publisher site journal article supplement (https://www.dovepress.com/article/1511153)
Supplement: Supplementary file 1 [file get_supplementary_file.php]

**A functional SNP upstream of the *ADRB2* gene is associated with COPD**

Jin-Xiu Li,<sup>1,2,\*</sup> Wei-Ping Fu,<sup>3,\*</sup> Jing Zhang,<sup>4</sup> Xiao-Hua Zhang,<sup>1,2</sup> Chang Sun,<sup>1,5</sup> Lu-Ming Dai,<sup>3</sup> Li Zhong,<sup>1,5,6</sup> Li Yu,<sup>1,2</sup> Ya-Ping Zhang,<sup>1,7</sup>

<sup>1</sup>State Key Laboratory for Conservation and Utilization of Bio-resource in Yunnan, Yunnan University, Kunming, China; <sup>2</sup>Key Laboratory for Animal Genetic Diversity and Evolution of High Education in Yunnan Province, School of Life Sciences, Yunnan University, Kunming, China; <sup>3</sup>Department of Respiratory Critical Care Medicine, the First Affiliated Hospital of Kunming Medical University, Kunming, China; <sup>4</sup>Department of thoracic surgery, the First Affiliated Hospital of Kunming Medical University, Kunming, China; <sup>5</sup>College of Life Sciences, Shaanxi Normal University, Xi'an, China; <sup>6</sup>Provincial Demonstration Center for Experimental Biology Education, Shaanxi Normal University, Xi'an, China; <sup>7</sup>State Key Laboratory of Genetic Resources and Evolution, and Yunnan Laboratory of Molecular Biology of Domestic Animals, Kunming Institute of Zoology, Chinese Academy of Sciences, Kunming, China.

Correspondence: Ya-Ping Zhang, State Key Laboratory of Genetic Resources and Evolution, and Yunnan Laboratory of Molecular Biology of Domestic Animals, Kunming Institute of Zoology, Chinese Academy of Sciences, Kunming 650091, China. E-mail: [zhangyp@mail.kiz.ac.cn](mailto:zhangyp@mail.kiz.ac.cn), Tel: 0871-65130513, Li Zhong, State Key Laboratory for Conservation and Utilization of Bio-resource in Yunnan, Yunnan University, Kunming 650091, China. E-mail: [lizhong@snnu.edu.cn](mailto:lizhong@snnu.edu.cn), Tel: 029-85310469.

\*These authors contributed equally to this work.

SUPPLEMENTAL FIGURES

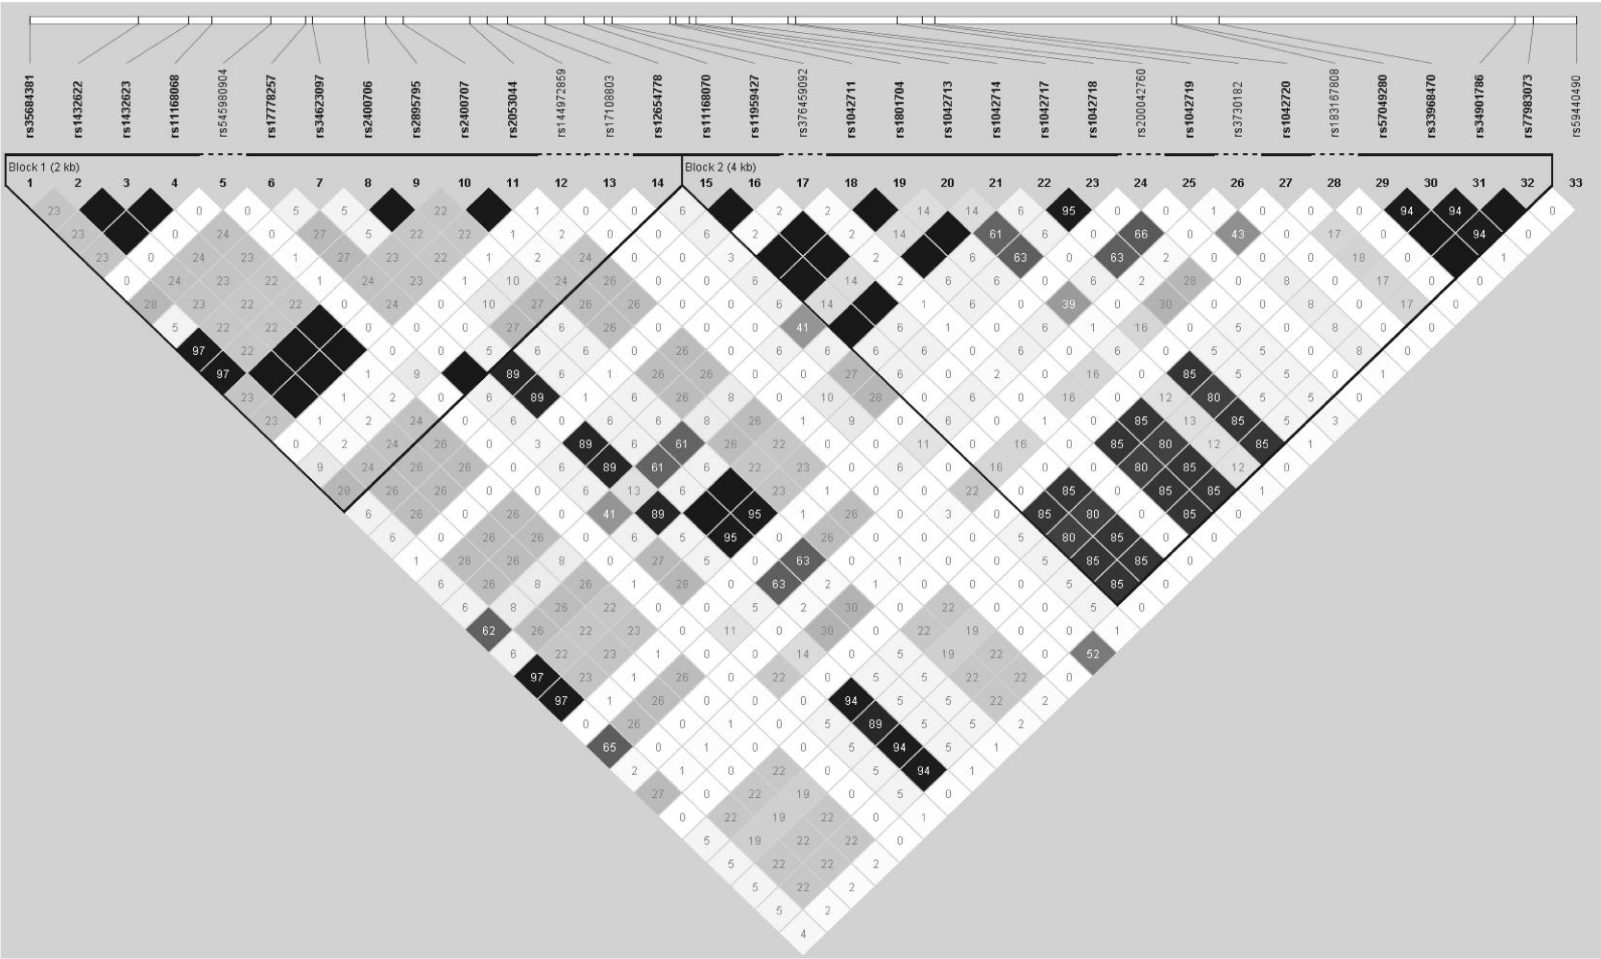

Supplementary Figure 1 The visual genotype of *ADRB2* in East Asian population from 1000 genomes project.

### 1 rs1042713-A forest plot under allele model

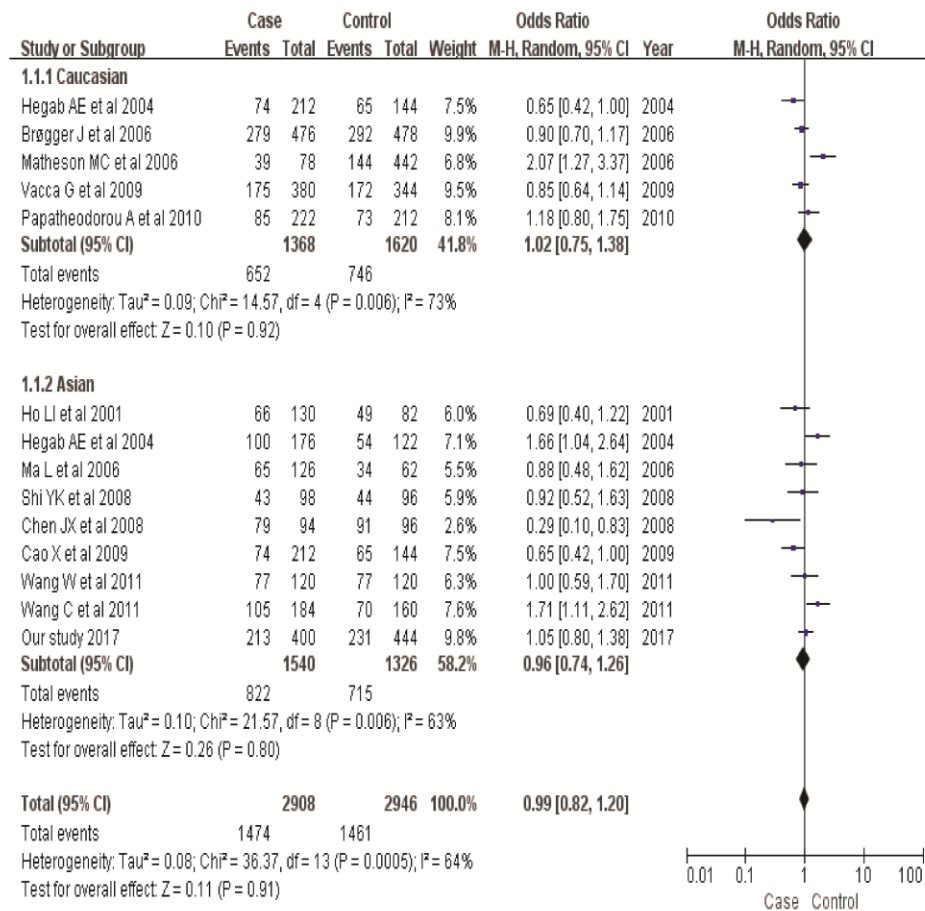

### 2 rs1042714-C forest plot under allele model

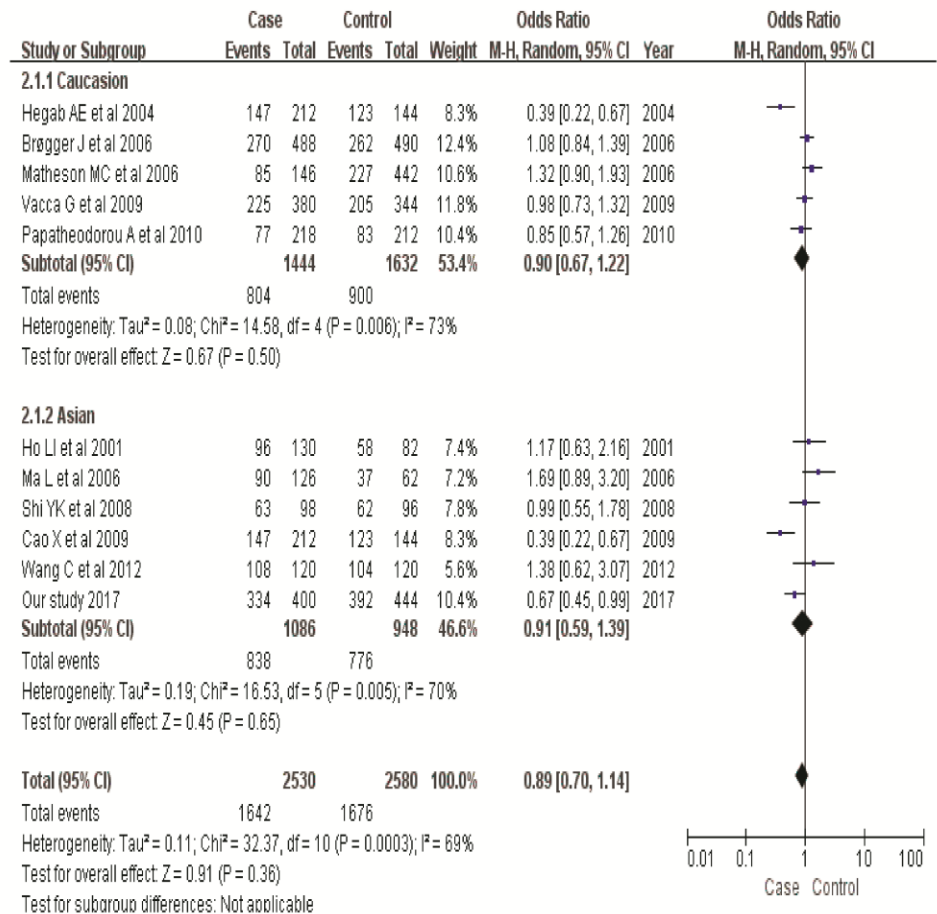

**Supplementary Figure 2** The meta-analysis of rs1041713-A and rs1042714-C with COPD in allele frequency.

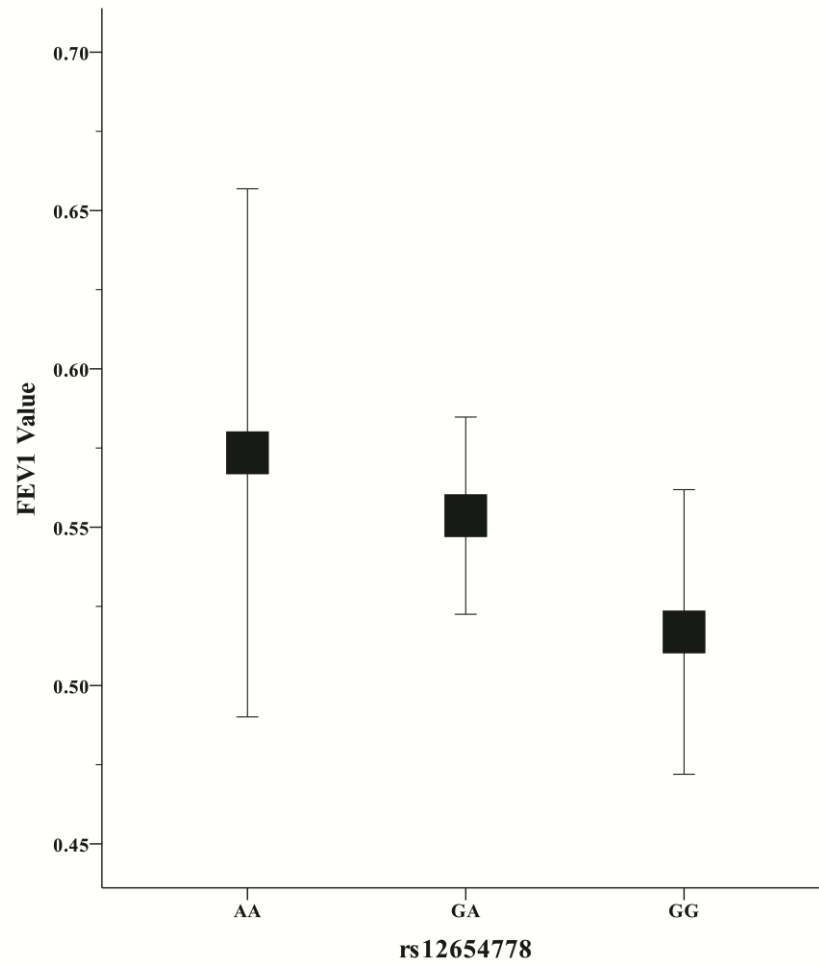

**Supplementary Figure 3** Lung function level (FEV<sub>1</sub> value) of COPD patients with different genotype of rs12654778. The data was displayed by means  $\pm$  SD.

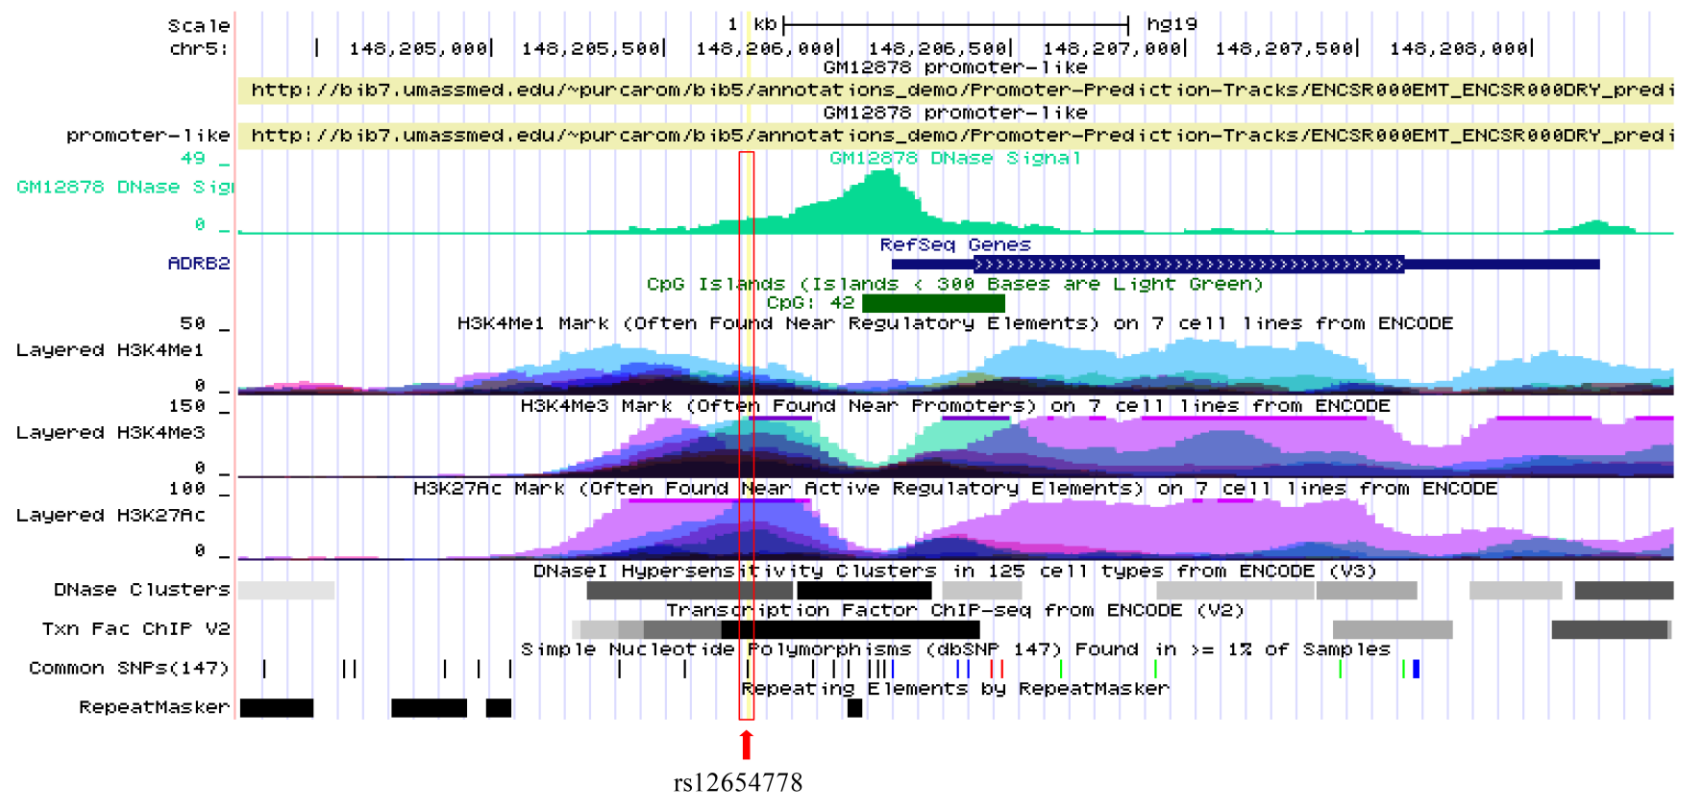

**Supplementary Figure 4** Regulatory motifs within the rs12654778 locus. The rs12654778 locus is shown in yellow vertical bar with red box, annotated with Refseq genes, histone marks (H3K4Me1, H3K4Me3, H3K27Ac), DNase hypersensitivity, transcription factor binding and CpG islands (UCSC Genome Browser (<http://genome.ucsc.edu/>)) on the Human Feb 2009 (GRCh37/hg19) assembly.

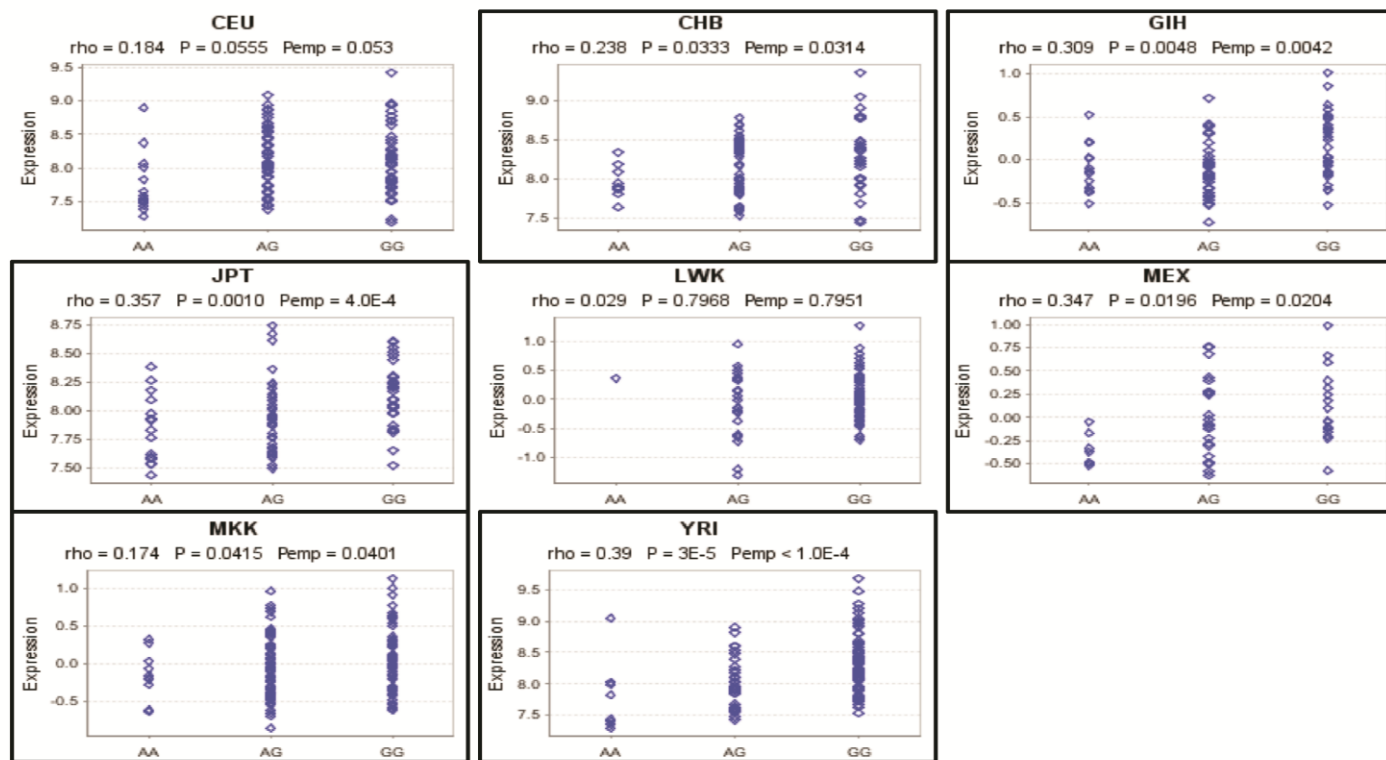

**Supplementary Figure 5** The association between rs12654778 and *ADRB2* expression in LCL in HapMap3 populations. Black frame represented rs12654778 in LCL in HapMap3 populations associated with a significant *ADRB2* gene expression ( $P < 0.05$ ).

## SUPPLEMENTAL TABLES

**Supplementary Table 1** The primers used in SNaPshot genotyping

| SNP ID     | PCR primers(5'–3')                                             | Single base extension primer (5'–3')                                   |
|------------|----------------------------------------------------------------|------------------------------------------------------------------------|
| rs17108803 | GAGTACCCAGATGGAGACATCC<br>AGAAACAAACACAGAAGCACC                | CCTCCAAGCCAGCGTGTGTTTACTT                                              |
| rs12654778 | TGGGAGGGTGTGTCTCAG<br>AGGCACGCACATACAGGC                       | TGACTTATGGCTGTGGTTCGGTATAAGTCT                                         |
| rs1042713  | TCACCTGCCAGACTGCGC<br>ACACCTCGTCCCTTTTCCT                      | ACTGACTGACTGACTCAGCGCCTTCTTGCTGGCACCCCAAT                              |
| rs1432623  | AGAAGACTAACAACATATTCTAAACCACTA<br>ATAGTAAGAAATATGAAAATGCTTTTGC | GACTGACTGACTGACTGACTTTTATGTAAACTTCGCTTACAAACTA                         |
| rs1042720  | ATAACATTGATTCACAAGGGAGG<br>TTTAGTGTTCTGTTGGGGGG                | CTGACTGACTGACTGACTGACTGACTGACTATTGTAGTACAAATGACTCACTGCT                |
| rs1042714  | TTCTTGCTGGCACCCAAT<br>AGACATGACGATGCCCAT                       | ACTGACTGACTGACTGACTGACTGACTGACTGACTTGCGCCGGACCACGACGTCACGCAG           |
| rs1042717  | TCACCAACTACTTCATCACTTCAC<br>AAGTTGCCAAAAGTCCACATT              | GACTGACTGACTGACTGACTGACTGACTGACTGACTGACTCCTGTGCTGATCTGGTCATGGGCCT      |
| rs1042719  | TTCCAGGAGCTTCTGTGC<br>ATATCCACTCTGCTCCCCTG                     | TGACTGACTGACTGACTGACTGACTGACTGACTGACTGACTGACTGCAGGTCTTCTTTGAAGGCCTATGG |

**Supplementary Table 2** The LD blokes of 32 SNPs in *ADRB2* gene and Tag-SNPs selection

| Bin | Total number of sites | Average Minor Allele Frequency | SNPs        | Location in <i>ADRB2</i> gene region <sup>a</sup> | Tag-SNP    |
|-----|-----------------------|--------------------------------|-------------|---------------------------------------------------|------------|
| 1   | 5                     | 31%                            | rs1432622   | 5' intergenic                                     | rs1432623  |
|     |                       |                                | rs1432623   | 5' intergenic                                     |            |
|     |                       |                                | rs11168068  | 5' intergenic                                     |            |
|     |                       |                                | rs2400707   | 5' UTR                                            |            |
|     |                       |                                | rs2053044   | 5' UTR                                            |            |
| 2   | 1                     | 5%                             | rs17108803  | 5' UTR                                            | rs17108803 |
| 3   | 2                     | 36%                            | rs17778257  | 5' UTR                                            | rs12654778 |
|     |                       |                                | rs12654778  | 5' UTR                                            |            |
| 4   | 1                     | 44%                            | rs1042713   | missense                                          | rs1042713  |
| 5   | 10                    | 10%                            | rs34623097  | 5' UTR                                            | rs1042714  |
|     |                       |                                | rs11168070  | 5' intergenic                                     |            |
|     |                       |                                | rs11959427  | 5' intergenic                                     |            |
|     |                       |                                | rs1042711   | 5' UTR                                            |            |
|     |                       |                                | rs1801704   | 5' UTR                                            |            |
|     |                       |                                | rs1042714   | missense                                          |            |
|     |                       |                                | rs57049280  | 3' intergenic                                     |            |
|     |                       |                                | rs33968470  | 3' intergenic                                     |            |
|     |                       |                                | rs34901786  | 3' intergenic                                     |            |
|     |                       |                                | rs77983073  | 3' intergenic                                     |            |
|     |                       |                                | rs35684381  | 5' intergenic                                     |            |
|     |                       |                                | rs2400706   | 5' UTR                                            |            |
|     |                       |                                | rs2895795   | 5' UTR                                            |            |
| 6   | 5                     | 33%                            | rs1042717   | synonymous                                        | rs1042717  |
|     |                       |                                | rs1042718   | synonymous                                        |            |
|     |                       |                                | rs1042719   | synonymous                                        |            |
|     |                       |                                | rs1042720   | synonymous                                        |            |
|     |                       |                                | rs59440490  | 3' intergenic                                     |            |
| 7   | 1                     | 43%                            | rs1042719   | synonymous                                        | rs1042719  |
| 8   | 1                     | 38%                            | rs1042720   | synonymous                                        | rs1042720  |
| 9   | 1                     | 4%                             | rs59440490  | 3' intergenic                                     |            |
| 10  | 1                     | 2%                             | rs182759770 | 5' UTR                                            |            |
| 11  | 1                     | 1%                             | rs3730182   | synonymous                                        |            |
| 12  | 1                     | 1%                             | rs144972859 | 5' UTR                                            |            |
| 13  | 1                     | 1%                             | rs200042760 | missense                                          |            |
| 14  | 1                     | 1%                             | rs183167808 | 3' intergenic                                     |            |

**Note:** <sup>a</sup>: Location in *ADRB2* gene region as described in SNP database.



**Supplementary Table 3** Main characteristics of the studies included in the meta-analysis

| First author(Ref.)           | Year | Ethnicity/country  | rs1042713-A |       |         |       | rs1042714-C |       |         |       | Source of controls | Smoking status | HWE | Genotyping methods            |
|------------------------------|------|--------------------|-------------|-------|---------|-------|-------------|-------|---------|-------|--------------------|----------------|-----|-------------------------------|
|                              |      |                    | Case        |       | Control |       | Case        |       | Control |       |                    |                |     |                               |
|                              |      |                    | Allele      | Total | Allele  | Total | Allele      | Total | Allele  | Total |                    |                |     |                               |
| Hegab AE <sup>1</sup>        | 2004 | European/Egypt     | 74          | 212   | 65      | 144   | 147         | 212   | 123     | 144   | Healthy smokers    | Smokers        | Yes | TaqMan allelic discrimination |
| Brogger J <sup>2</sup>       | 2006 | European/Norway    | 197         | 476   | 189     | 478   | 270         | 488   | 262     | 490   | Healthy smokers    | Smokers        | Yes | TaqMan PCR                    |
| Matheson MC <sup>3</sup>     | 2006 | European/Australia | 39          | 78    | 144     | 442   | 85          | 146   | 227     | 442   | General population | Mixed          | Yes | ARMS-PCR                      |
| Vacca G <sup>4</sup>         | 2009 | European/Germany   | 175         | 380   | 172     | 344   | 225         | 380   | 205     | 344   | Healthy volunteers | Smokers        | Yes | Allele-specific PCR           |
| Papatheodorou A <sup>5</sup> | 2010 | European/Greece    | 85          | 222   | 73      | 212   | 77          | 218   | 83      | 212   | Healthy smokers    | Smokers        | Yes | Nanogen NanoChip®400          |
| Ho LI <sup>6</sup>           | 2001 | Asian/China        | 66          | 130   | 49      | 82    | 96          | 130   | 58      | 82    | Healthy population | Not mentioned  | Yes | Allele-specific PCR           |
| Hegab AE <sup>1</sup>        | 2004 | Asian/Japan        | 100         | 176   | 54      | 122   | —           | —     | --      | --    | Healthy smokers    | Smokers        | Yes | TaqMan allelic discrimination |
| Ma L <sup>7</sup>            | 2006 | Asian/China        | 65          | 126   | 34      | 62    | 90          | 126   | 37      | 62    | Healthy population | Not mentioned  | No  | Allele-specific PCR           |
| Shi YK <sup>8</sup>          | 2008 | Asian/China        | 43          | 98    | 44      | 96    | 63          | 98    | 62      | 96    | Healthy smokers    | Smokers        | Yes | PCR direct sequencing         |
| Chen JX <sup>9</sup>         | 2008 | Asian/China        | 79          | 94    | 91      | 96    | --          | --    | --      | --    | Healthy population | Not mentioned  | No  | PCR direct sequencing         |
| Cao X <sup>10</sup>          | 2009 | Asian/China        | 74          | 212   | 65      | 144   | 147         | 212   | 123     | 144   | Healthy smokers    | Smokers        | Yes | PCR-RFLP                      |
| Wang C <sup>11</sup>         | 2011 | Asian/China        | 77          | 120   | 77      | 120   | --          | --    | --      | --    | Healthy smokers    | Smokers        | Yes | Allele-specific PCR           |
| Wang W <sup>12</sup>         | 2011 | Asian/China        | 105         | 184   | 70      | 160   | --          | --    | --      | --    | Healthy smokers    | Smokers        | Yes | Allele-specific PCR           |
| Wang C <sup>13</sup>         | 2012 | Asian/China        | --          | --    | --      | --    | 108         | 120   | 104     | 120   | Healthy smokers    | Smokers        | Yes | Allele-specific PCR           |
| Our study                    | 2017 | Asian/China        | 213         | 400   | 231     | 444   | 334         | 400   | 392     | 444   | Healthy smokers    | Smokers        | Yes | SNaPshot                      |

**Abbreviations:** COPD: chronic obstructive pulmonary disease; HWE: Hardy-Weinberg equilibrium; PCR: polymerase chain reaction; RFLP: restriction fragment length polymorphism.

## References

1. Hegab AE, Sakamoto T, Saitoh W, et al. Polymorphisms of IL4, IL13, and ADRB2 genes in COPD. *Chest*. 2004;126(6):1832-1839.
2. Brogger J, Steen VM, Eiken HG, et al. Genetic association between COPD and polymorphisms in TNF, ADRB2 and EPHX1. *Eur Respir J*. 2006;27(4):682-688.
3. Matheson MC, Ellis JA, Raven J, et al. Beta2-adrenergic receptor polymorphisms are associated with asthma and COPD in adults. *J Hum Genet*. 2006;51(11):943-951.
4. Vacca G, Schwabe K, Duck R, et al. Polymorphisms of the beta2 adrenoreceptor gene in chronic obstructive pulmonary disease. *Ther Adv Respir Dis*. 2009;3(1):3-10.
5. Papatheodorou A, Makrythanasis P, Kaliakatsos M, et al. Development of novel microarray methodology for the study of mutations in the SERPINA1 and ADRB2 genes--their association with Obstructive Pulmonary Disease and Disseminated Bronchiectasis in Greek patients. *Clin Biochem*. 2010;43(1-2):43-50.
6. Ho LI, Harn HJ, Chen CJ, et al. Polymorphism of the beta(2)-adrenoceptor in COPD in Chinese subjects. *Chest*. 2001;120(5):1493-1499.
7. Ma L, Feng DX, Zhang XY, et al. Association between the genetic polymorphisms of  $\beta$ 2-adrenergic receptor and the chronic obstructive pulmonary disease. *Chinese J Pract Intern Med*. 2006;26(4):267-269.
8. Shi YK, Ma J, Yuan ZJ, et al. Investigation on the relation between polymorphisms of  $\beta$ 2 adrenergic receptor and the chronic obstructive pulmonary disease. *Shandong Med*. 2008;48(13):9-11.
9. Chen JX, Shi YK, Li SL, et al. The Study of  $\beta$ 2-AR Polymorphisms and Chronic Obstructive Pulmonary Disease on Relations. *Acta Acad Med Weifang*. 2008;30(1):63-65.
10. Cao X, Li QQ, Chen GZ, et al. Polymorphism of IL-4, IL-13, and ADR Beta 2 Genes in Patients with Chronic Obstructive Pulmonary Disease. *Med J Wuhan Univ*. 2009;30(2):219-223.
11. Wang C, Tan F, Yang AL, et al. Association between the Arg16Gly  $\beta$ 2-adrenoceptor polymorphisms and the older-aged chronic obstructive pulmonary disease with hypertension(in Chinese). *J Pract Med*. 2011;28(7):4442-4444.
12. Wang W, Yu YJ, Qian R, et al. Association between the susceptibility of COPD and IL-13, IL-4, polymorphisms of beta2-adrenergic receptor. *J Clin Intern Med*. 2011;28(5):332-334.
13. Wang C, Yang AL, Li H, et al. Association between the Gln27Glu  $\beta$ 2-adrenoceptor

polymorphisms and the older-aged chronic obstructive pulmonary disease with hypertension(in Chinese). *J Pract Med*. 2012;28(7):1100-1103.
